# Supplementary material
Source: PubMed Central journal article supplement (PMC7112133)
Supplement: mmc1.pdf [file mmc1.pdf]

N\* 3Da shift on N after PNGase F treatment in H2O18 water.

**N212:**

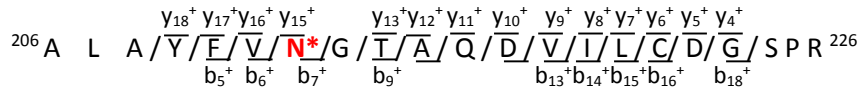

Spike\_Nglyco30July #7677 RT: 81.80 AV: 1 NL: 6.28E2  
 T: ITMS + c NSI d Full ms2 1136.08@cid35.00 [300.00-2000.00]

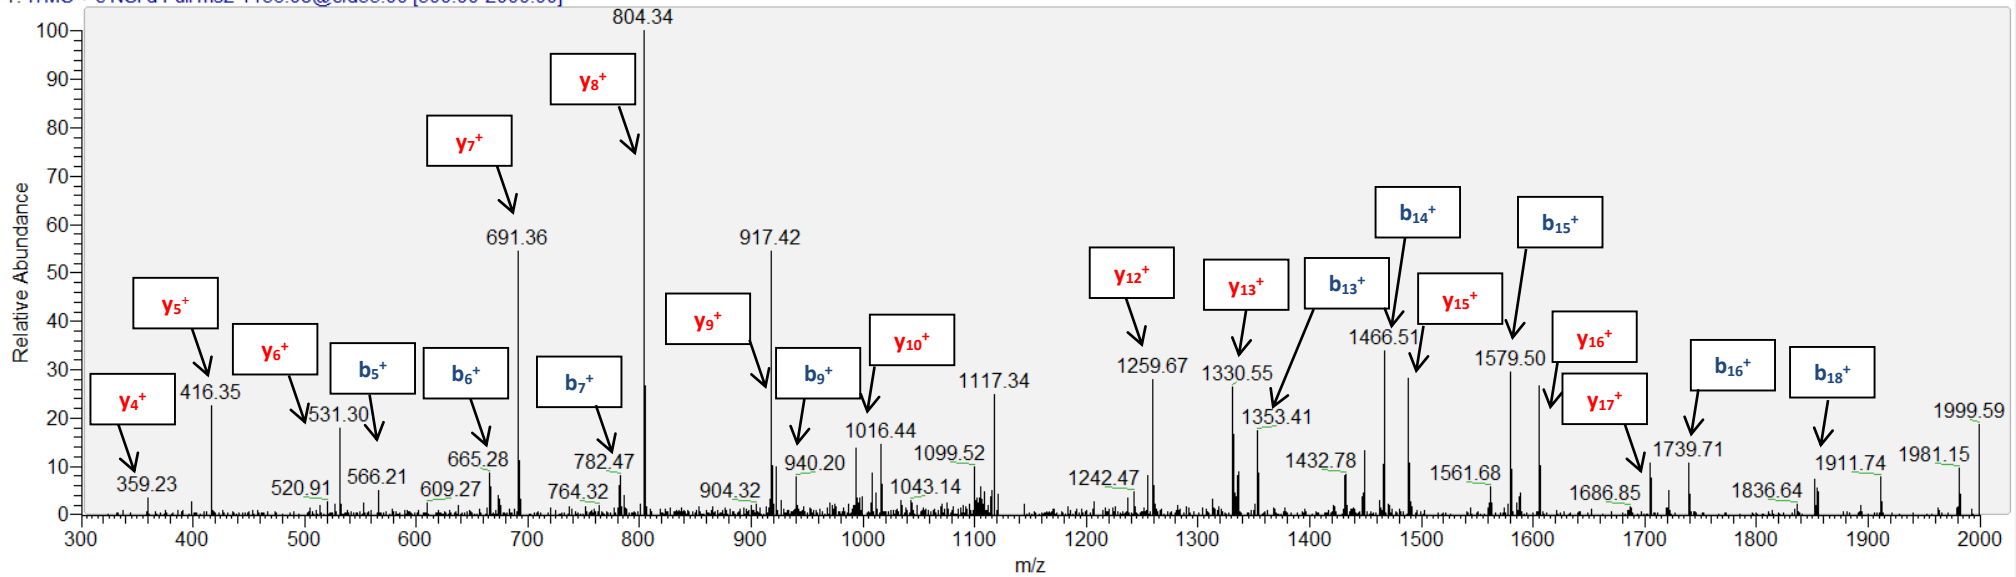

LC-MS/MS spectrum of the doubly charged peak (ALAYFVN\*GTAQDVLICDGSPR,  $[M+2H]^{2+} = 1136.08 \text{ m/z}$ ). In the CID MS/MS spectrum, most y ions ( $y_{17}^+$ ,  $y_{16}^+$ ,  $y_{15}^+$ ,  $y_{13}^+$ ,  $y_{12}^+$ ,  $y_{11}^+$ ,  $y_{10}^+$ ,  $y_9^+$ ,  $y_8^+$ ,  $y_7^+$ ,  $y_6^+$ ,  $y_5^+$ ,  $y_4^+$ ) and b ions ( $b_{18}^+$ ,  $b_{16}^+$ ,  $b_{15}^+$ ,  $b_{14}^+$ ,  $b_{13}^+$ ,  $b_9^+$ ,  $b_7^+$ ,  $b_6^+$ ,  $b_5^+$ ) match well to their theoretical  $m/z$  scores.

**N237/N247:**

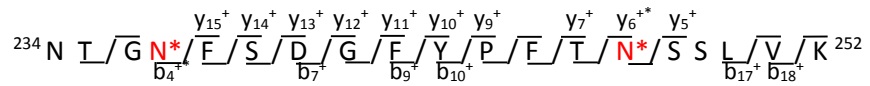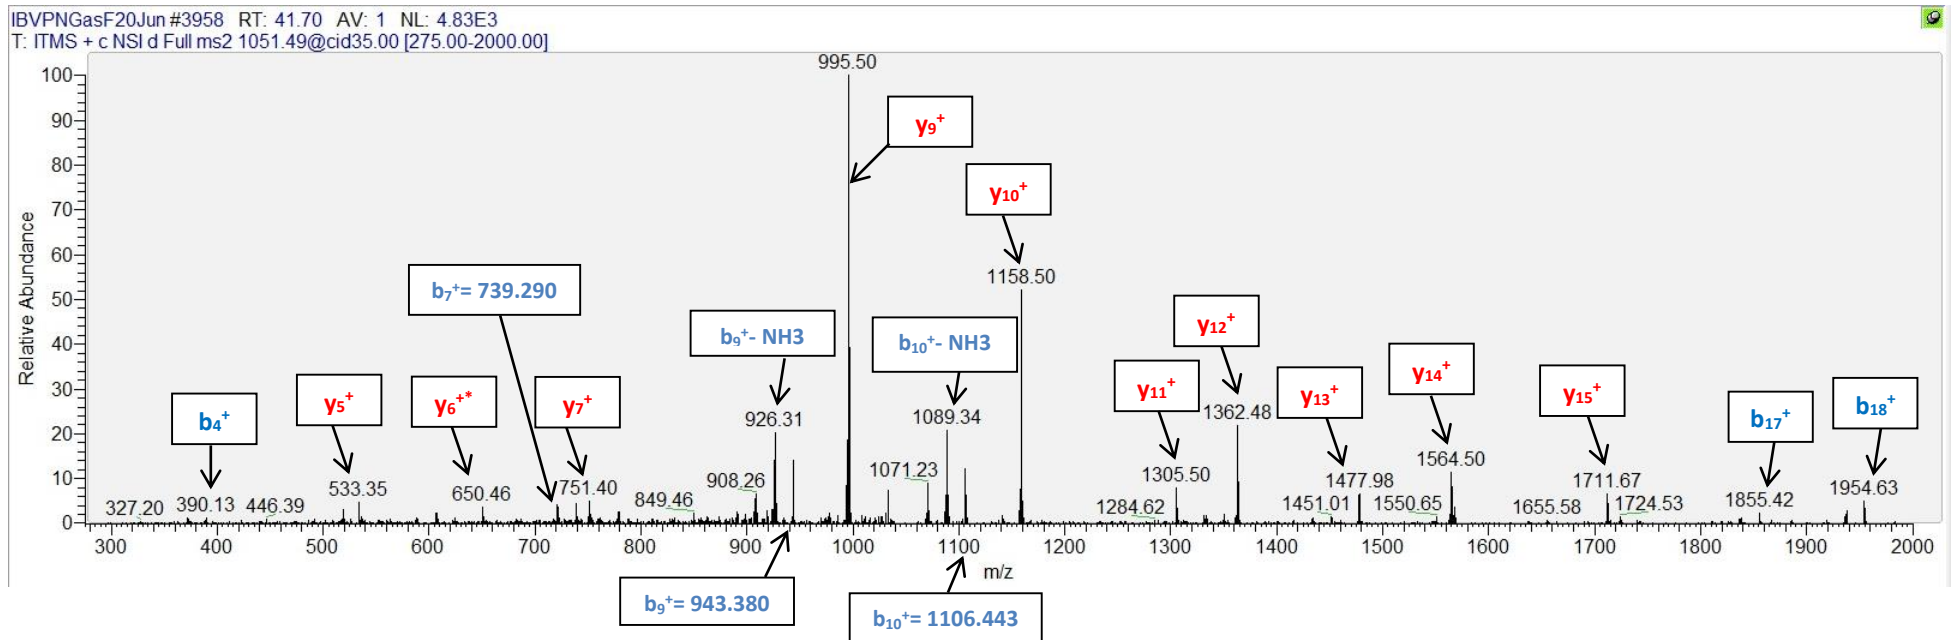

LC-MS/MS spectrum of the doubly charged peak (NTGN\*FSDGFY PFTN\*SSLVK,  $[\text{M}+2\text{H}]^{2+} = 1051.49 \text{ m/z}$ ). In the CID MS/MS spectrum, most y ions ( $\text{y}_{17}^+$ ,  $\text{y}_{15}^+$ ,  $\text{y}_{14}^+$ ,  $\text{y}_{13}^+$ ,  $\text{y}_{12}^+$ ,  $\text{y}_{11}^+$ ,  $\text{y}_{10}^+$ ,  $\text{y}_9^+$ ,  $\text{y}_7^+$ ,  $\text{y}_6^{+*}$ ,  $\text{y}_5^+$ ) and b ions ( $\text{b}_{18}^+$ ,  $\text{b}_{17}^+$ ,  $\text{b}_{10}^+$ ,  $\text{b}_{10}^+ - \text{NH}_3$ ,  $\text{b}_9^+$ ,  $\text{b}_9^+ - \text{NH}_3$ ,  $\text{b}_7^+$ ,  $\text{b}_6^+$ ,  $\text{b}_4^+$ ) match well to their theoretical  $m/z$  scores.

**N276:**

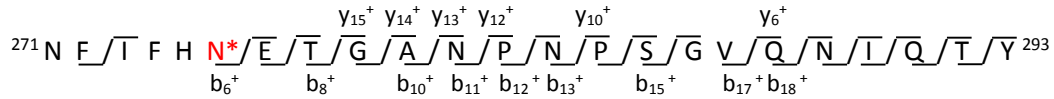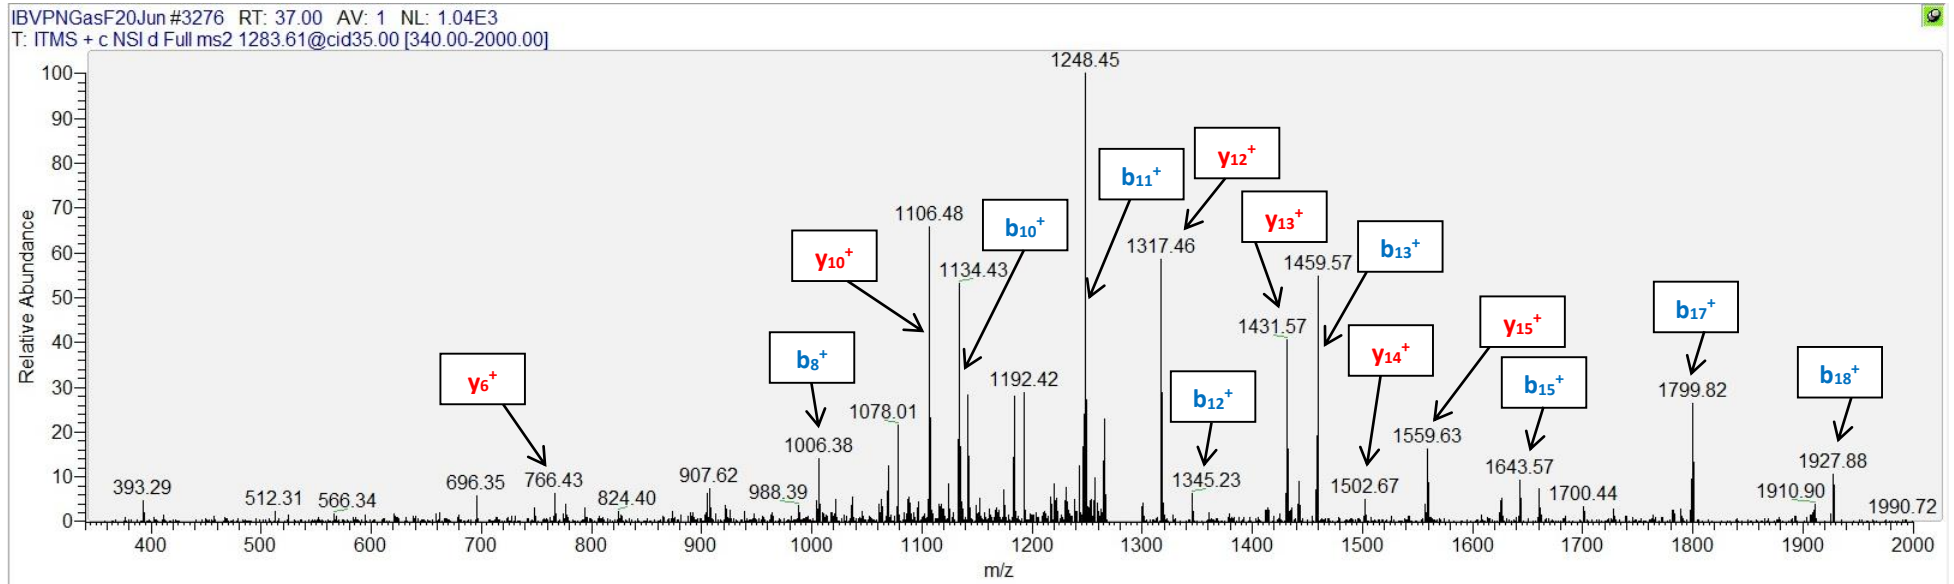

LC- MS/MS spectrum of the doubly charged peak (NFIFHN\*ETGANPNPSGVQNIQTY, [M+2H]<sup>2+</sup> =1283.61 m/z). In the CID MS/MS spectrum, most y ions ( y<sub>15</sub><sup>+</sup>, y<sub>14</sub><sup>+</sup>, y<sub>13</sub><sup>+</sup>, y<sub>12</sub><sup>+</sup>, y<sub>10</sub><sup>+</sup>, y<sub>6</sub><sup>+</sup>) and b ions ( b<sub>18</sub><sup>+</sup>, b<sub>17</sub><sup>+</sup>, b<sub>15</sub><sup>+</sup>, b<sub>13</sub><sup>+</sup>, b<sub>12</sub><sup>+</sup>, b<sub>11</sub><sup>+</sup>, b<sub>10</sub><sup>+</sup>, b<sub>8</sub><sup>+</sup>, b<sub>6</sub><sup>+</sup>) match well to their theoretical m/z scores.

**N513:**

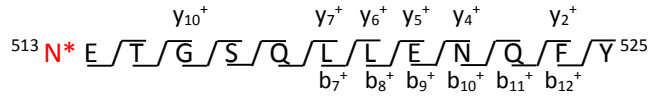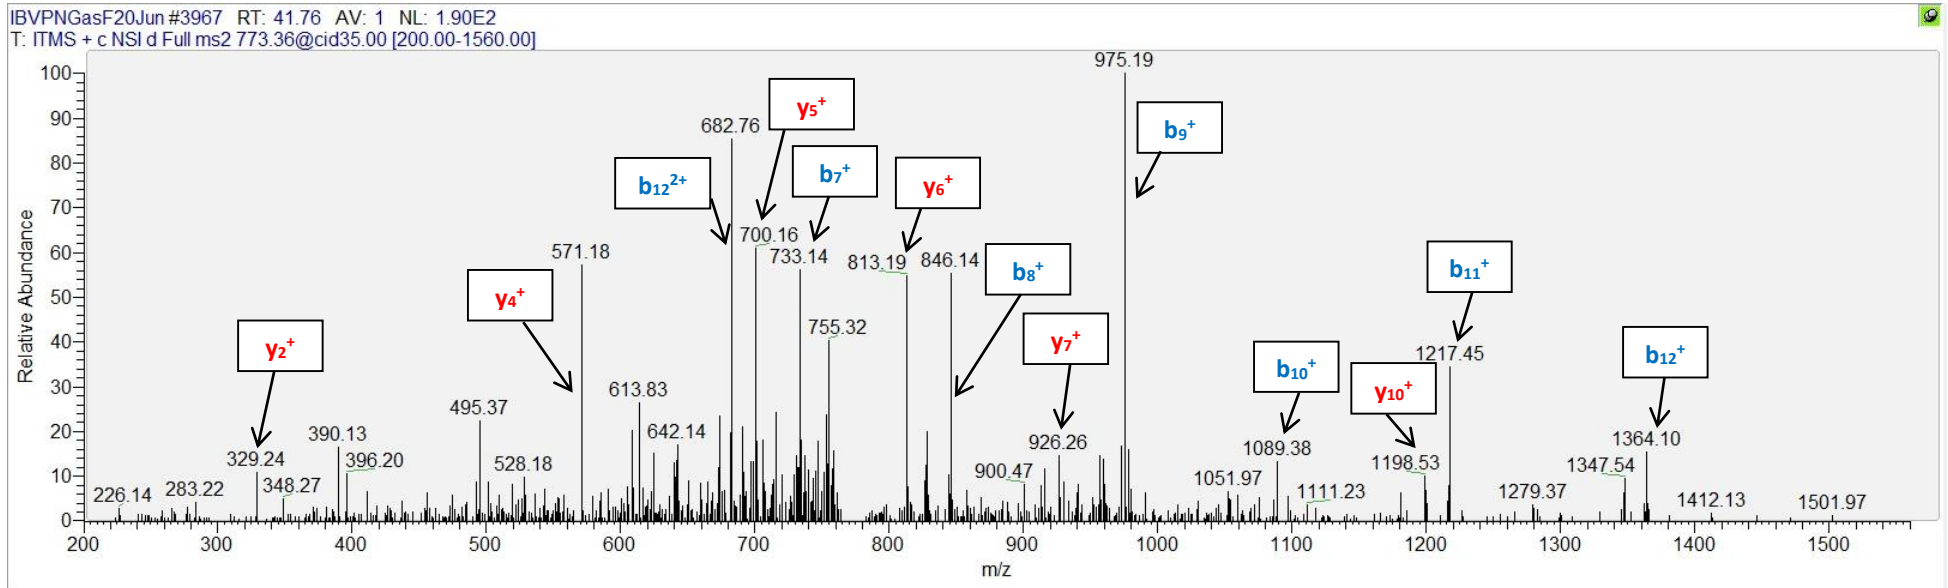

LC MS/MS spectrum of doubly charged peak (N\*ETGSQ LLENQFY,  $[M+2H]^{2+} = 773.36$  m/z). In the CID MS/MS spectrum, most y ions (y<sub>10</sub><sup>+</sup>, y<sub>7</sub><sup>+</sup>, y<sub>6</sub><sup>+</sup>, y<sub>5</sub><sup>+</sup>, y<sub>4</sub><sup>+</sup>, y<sub>2</sub><sup>+</sup>) and b ions (b<sub>12</sub><sup>+</sup>, b<sub>11</sub><sup>+</sup>, b<sub>10</sub><sup>+</sup>, b<sub>9</sub><sup>+</sup>, b<sub>8</sub><sup>+</sup>, b<sub>7</sub><sup>+</sup>) match well to their theoretical m/z scores.

### N591:

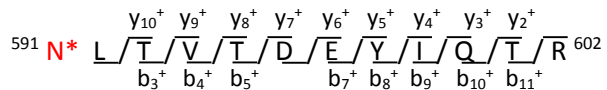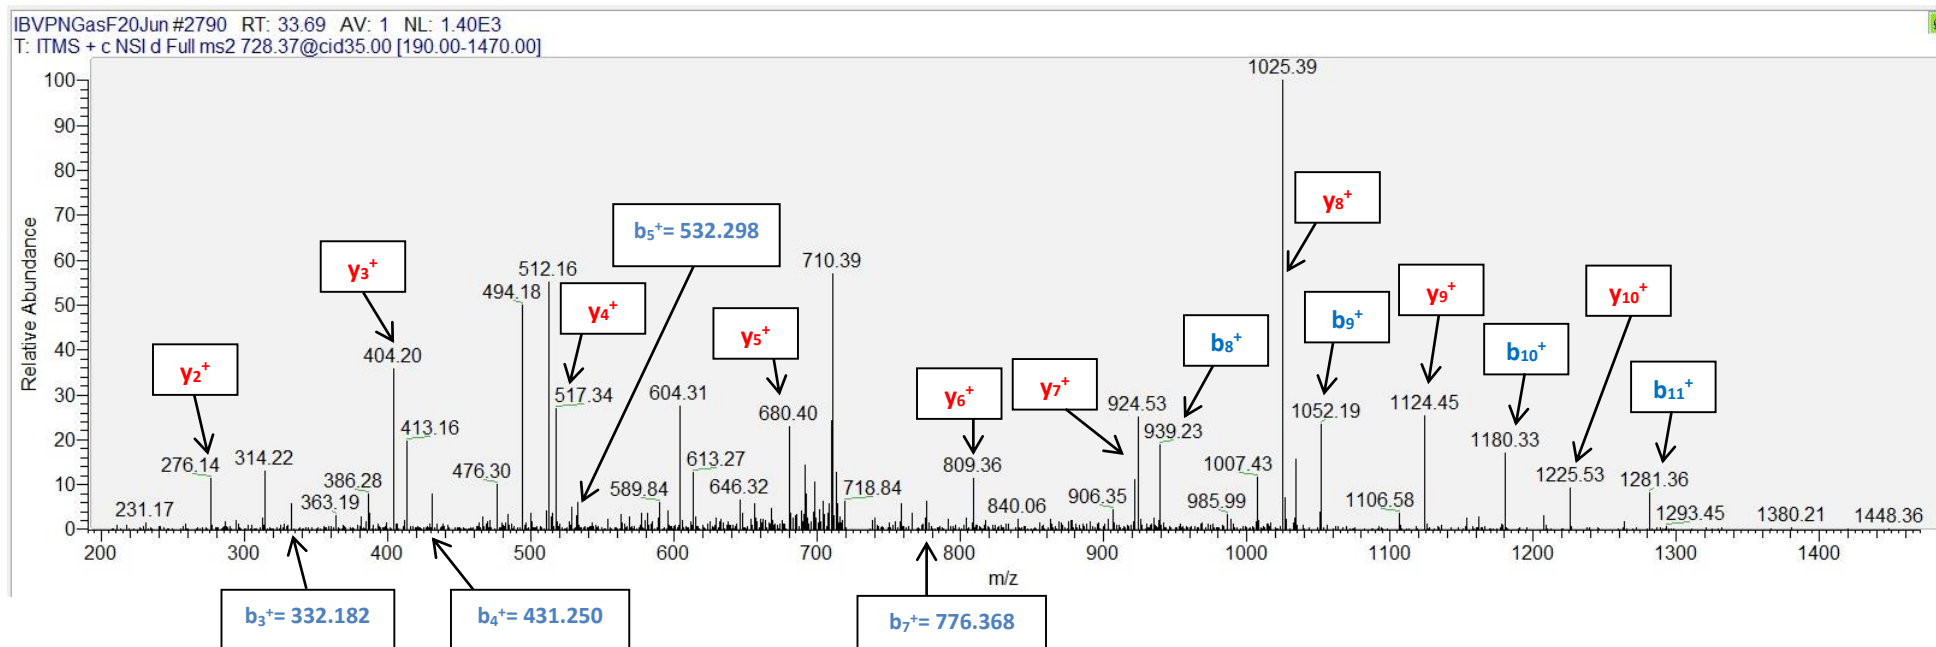

LC- MS/MS spectrum of the doubly charged peak ( $N^*LTVTDEYIQR$ ,  $[M+2H]^{2+} = 728.37 \text{ m/z}$ ). In the CID MS/MS spectrum, most y ions ( $Y_{10}^+$ ,  $Y_9^+$ ,  $Y_8^+$ ,  $Y_7^+$ ,  $Y_6^+$ ,  $Y_5^+$ ,  $Y_4^+$ ,  $Y_3^+$ ,  $Y_2^+$ ) and b ions ( $b_{11}^+$ ,  $b_{10}^+$ ,  $b_9^+$ ,  $b_8^+$ ,  $b_7^+$ ,  $b_5^+$ ,  $b_4^+$ ,  $b_3^+$ ) match well to their theoretical  $m/z$  scores.

**N1051:**

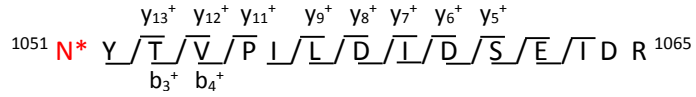

IBVPNGasF20Jun #4264 RT: 43.87 AV: 1 NL: 3.99E3  
T: ITMS + c NSI d Full ms2 883.45@cid35.00 [230.00-1780.00]

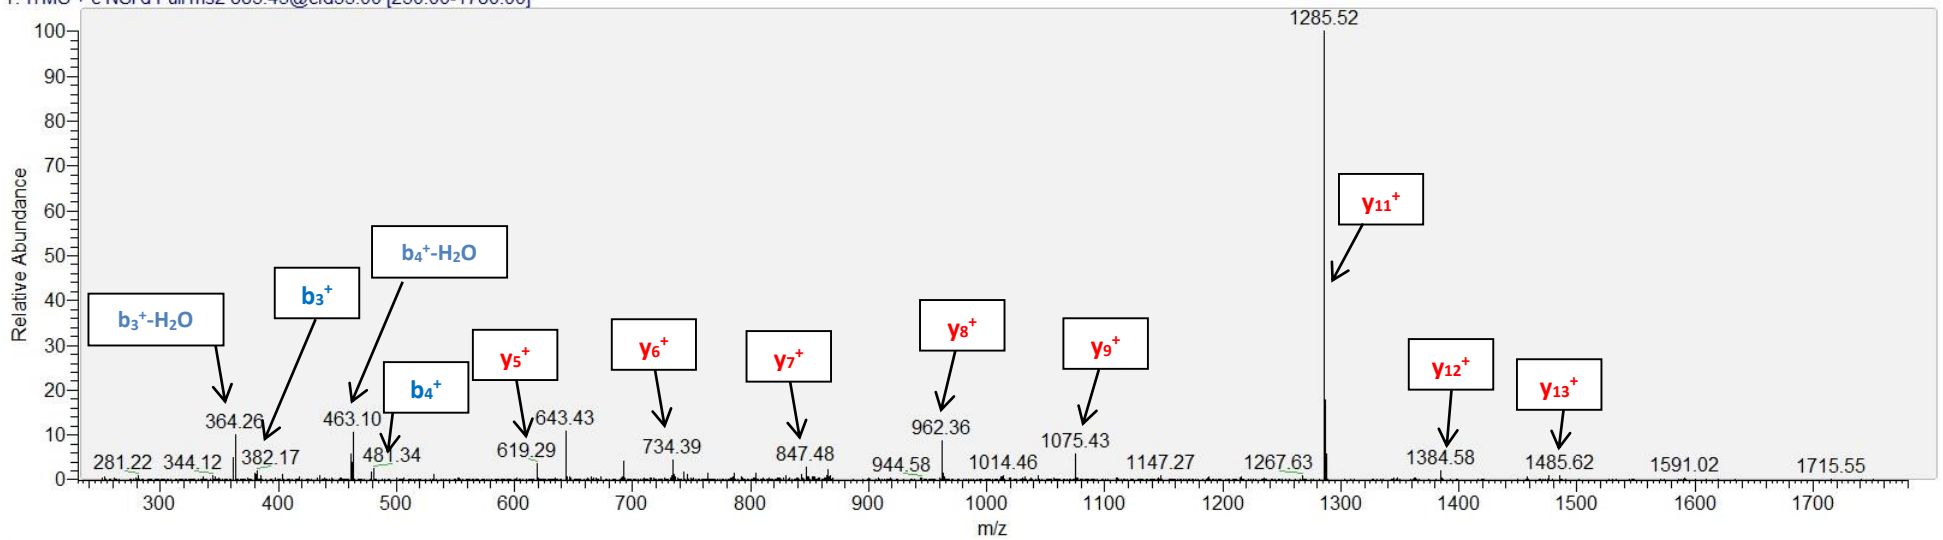

LC- MS/MS spectrum of the doubly charged peak ( $\text{N}^* \text{YTVPIILDISEIDR}$ ,  $[\text{M}+2\text{H}]^{2+} = 883.45 \text{ m/z}$ ). In the CID MS/MS spectrum, most y ions ( $\text{y}_{10}^+$ ,  $\text{y}_9^+$ ,  $\text{y}_8^+$ ,  $\text{y}_7^+$ ,  $\text{y}_6^+$ ,  $\text{y}_5^+$ ,  $\text{y}_4^+$ ,  $\text{y}_3^+$ ,  $\text{y}_2^+$ ) and b ions ( $\text{b}_3^+$ ,  $\text{b}_3^+ - \text{H}_2\text{O}$ ,  $\text{b}_4^+$ ,  $\text{b}_4^+ - \text{H}_2\text{O}$ ) match well to their theoretical m/z scores.
